# Supplementary material for: Week-long imaging of cell divisions in the Arabidopsis root meristem
Source: PubMed Central journal article supplement (PMC6446972; doi:10.1186/s13007-019-0417-9), 2019-03-25

Root Length  
(mm)

80  
60  
40  
20  
0

0 2 4 6 0 2 4 6 0 2 4 6 0 2 4 6  
coverslip coverslip plate plate

Time  
(days post transfer)

H2B  
WT

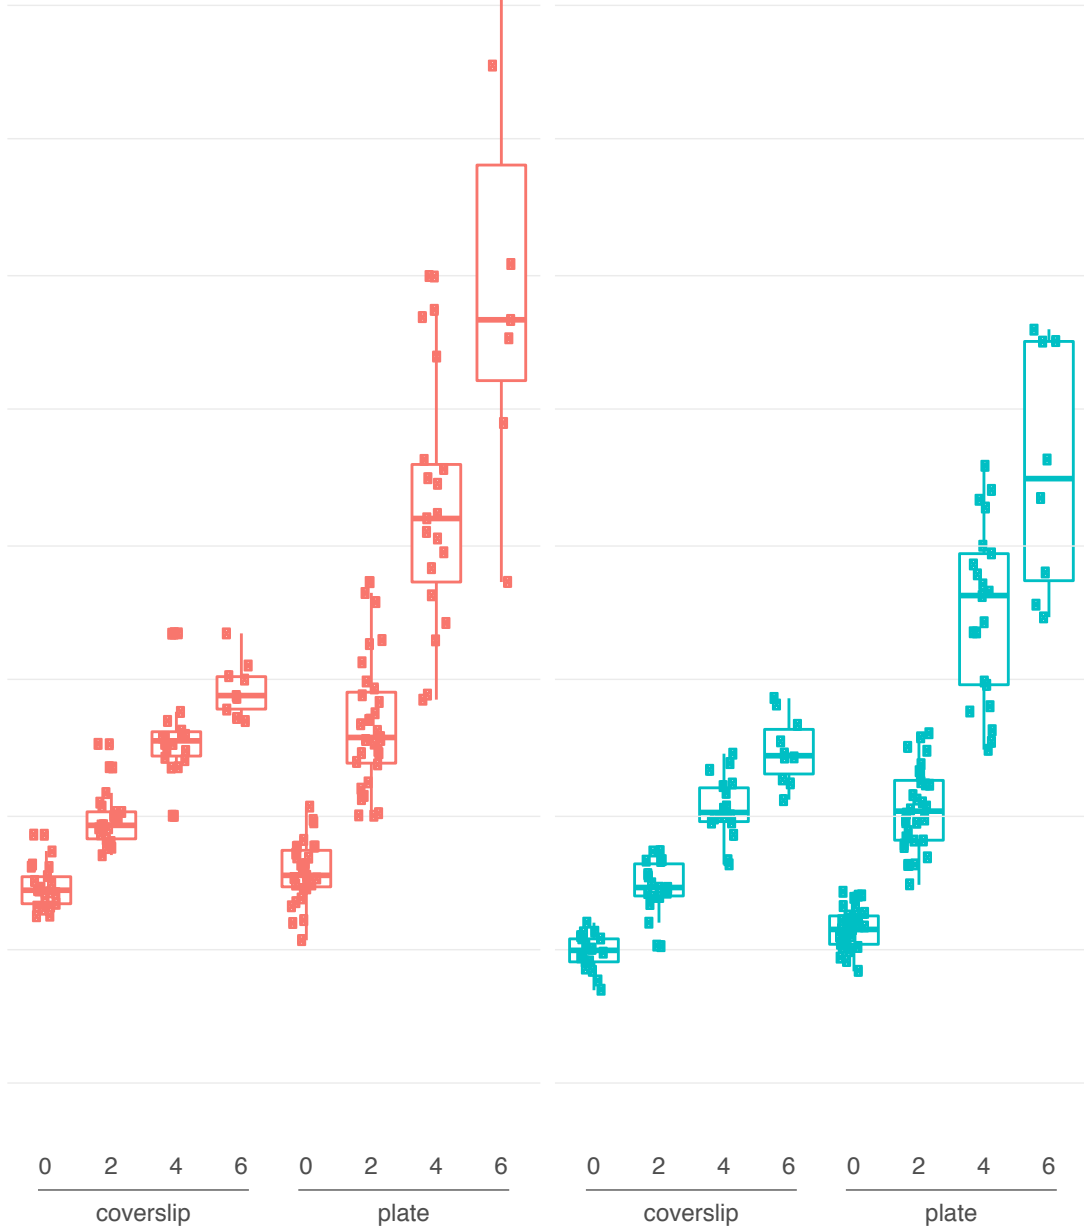

Supplement: 13007_2019_417_MOESM3_ESM.pdf [file 13007_2019_417_MOESM3_ESM.pdf]
