# Supplementary material for: Week-long imaging of cell divisions in the Arabidopsis root meristem
Source: PubMed Central journal article supplement (PMC6446972; doi:10.1186/s13007-019-0417-9), 2019-03-25
Supplement: 13007_2019_417_MOESM11_ESM.pdf [file 13007_2019_417_MOESM11_ESM.pdf]

# A: Positions -2 to -1, and 1 to 15

## two-way ANOVA

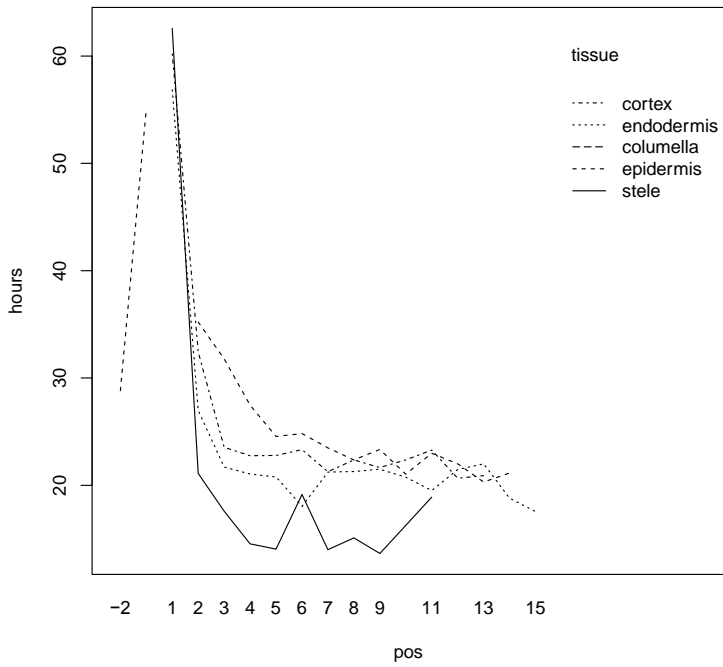

### >>> Figure legend: <<< ###

The figure represents interaction plot for hours (y-axis). The interaction between pos (x-axis) and tissue (different lines) was quantified using two-way ANOVA.

### Analysis of Variance Table

Response: pheno

|           | Df  | Sum Sq | Mean Sq | F value | Pr(>F)        |
|-----------|-----|--------|---------|---------|---------------|
| iv1       | 16  | 38619  | 2413.66 | 57.8164 | < 2.2e-16 *** |
| iv2       | 4   | 3143   | 785.76  | 18.8220 | 5.945e-14 *** |
| iv1:iv2   | 35  | 1087   | 31.04   | 0.7436  | 0.8558        |
| Residuals | 330 | 13777  | 41.75   |         |               |

---

Signif. codes: 0 '\*\*\*' 0.001 '\*\*' 0.01 '\*' 0.05 '.' 0.1 ' ' 1

iv1 corresponds to position and iv2 corresponds to tissue, with iv1:iv2 reflecting their interaction.

## B: Positions 1 to 15

### Testing significant differences

ANOVA

The p-value of the ANOVA test between different pos is 0.

SIGNIFICANT difference in means

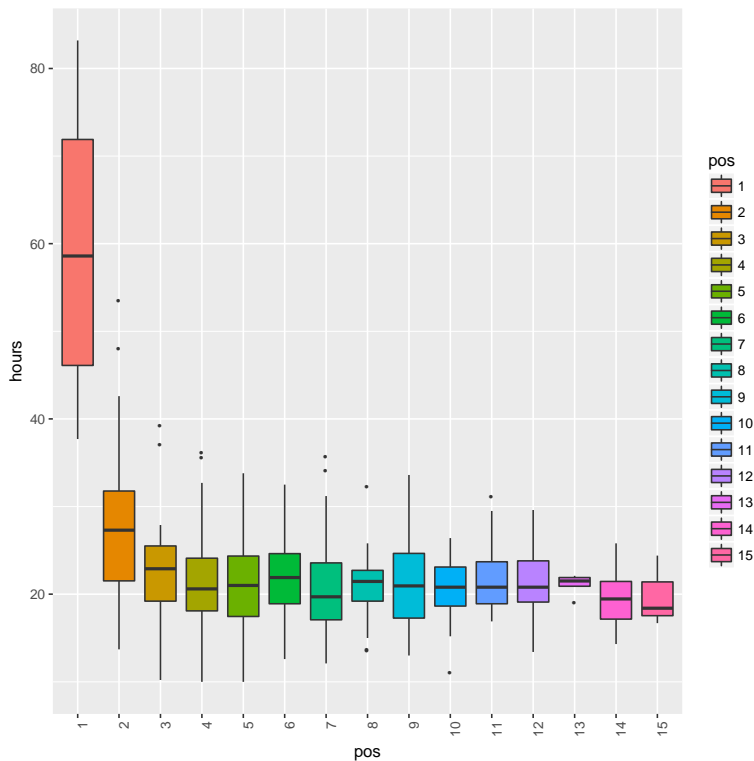

### >> Figure legend: <<< ###

The plot represents the boxplot of hours by pos . The data used is raw data .

pos hours Significant groups based on Tukey's pairwise comparison

|    |          |   |
|----|----------|---|
| 1  | 59.38235 | a |
| 2  | 28.30250 | b |
| 3  | 22.27500 | c |
| 11 | 21.79600 | c |
| 6  | 21.76053 | c |
| 9  | 21.50769 | c |
| 4  | 21.38605 | c |
| 12 | 21.36154 | c |
| 7  | 21.33000 | c |
| 13 | 21.10000 | c |
| 8  | 21.07727 | c |
| 5  | 20.65385 | c |
| 10 | 20.34211 | c |
| 15 | 19.83333 | c |
| 14 | 19.58333 | c |

## C: Positions 2 to 15

### Testing significant differences

ANOVA

The p-value of the ANOVA test between different tissue is 0.

SIGNIFICANT difference in means

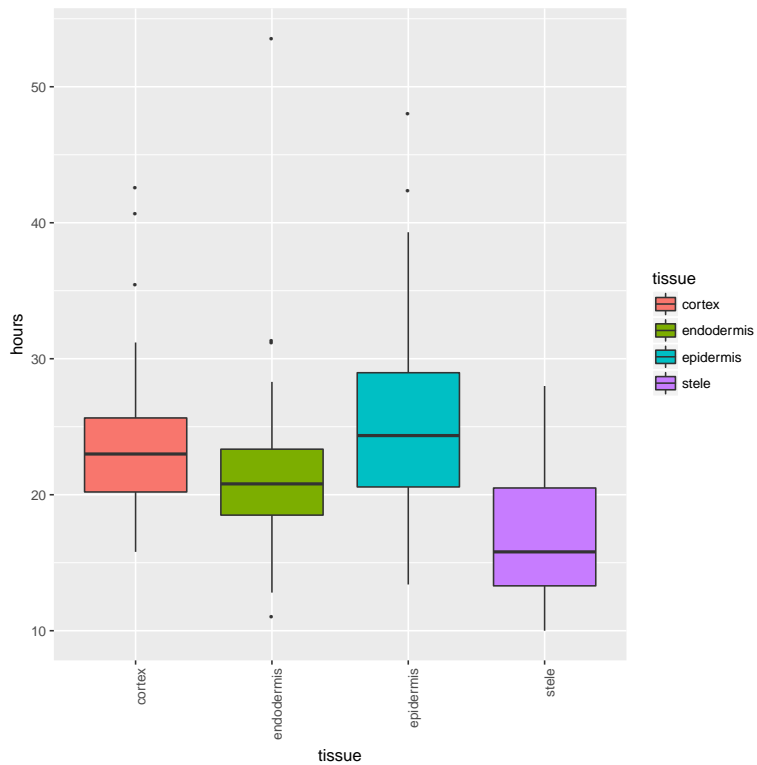

### >> Figure legend: <<< ###

The plot represents the boxplot of hours by tissue . The data used is raw data .

| tissue     | hours    | Significant groups based on Tukey's pairwise comparison |
|------------|----------|---------------------------------------------------------|
| epidermis  | 25.25000 | a                                                       |
| cortex     | 23.45862 | a                                                       |
| endodermis | 21.30090 | b                                                       |
| stele      | 16.96949 | c                                                       |
